# Supplementary figures and images for: A new 100-m Digital Elevation Model of the Antarctic Peninsula derived from ASTER Global DEM: methods and accuracy assessment
Source: Copernicus journal article supplement (doi:10.5194/essd-4-129-2012), 2012-10-18

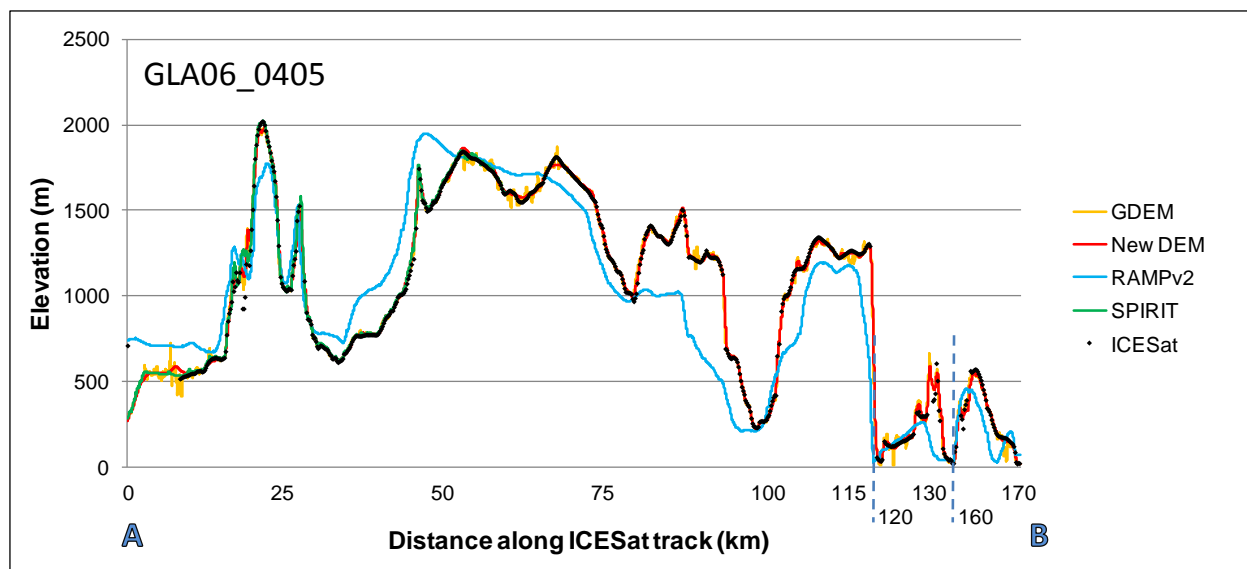

Supplement: Supplementary file 1 [file essd-4-129-2012-supplement.zip]

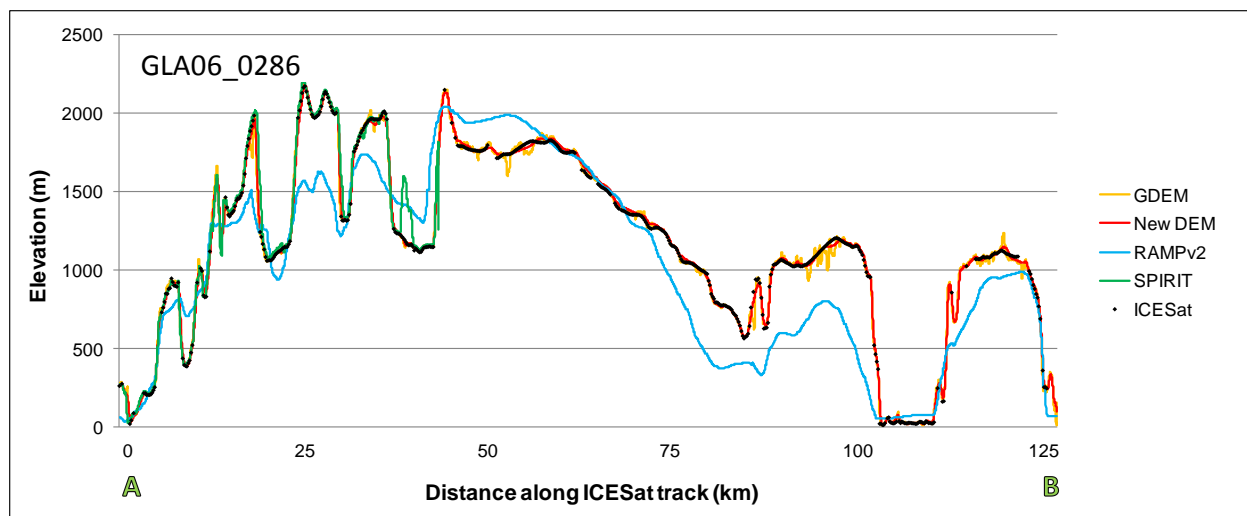

Supplement: Supplementary file 2 [file essd-4-129-2012-supplement.zip]

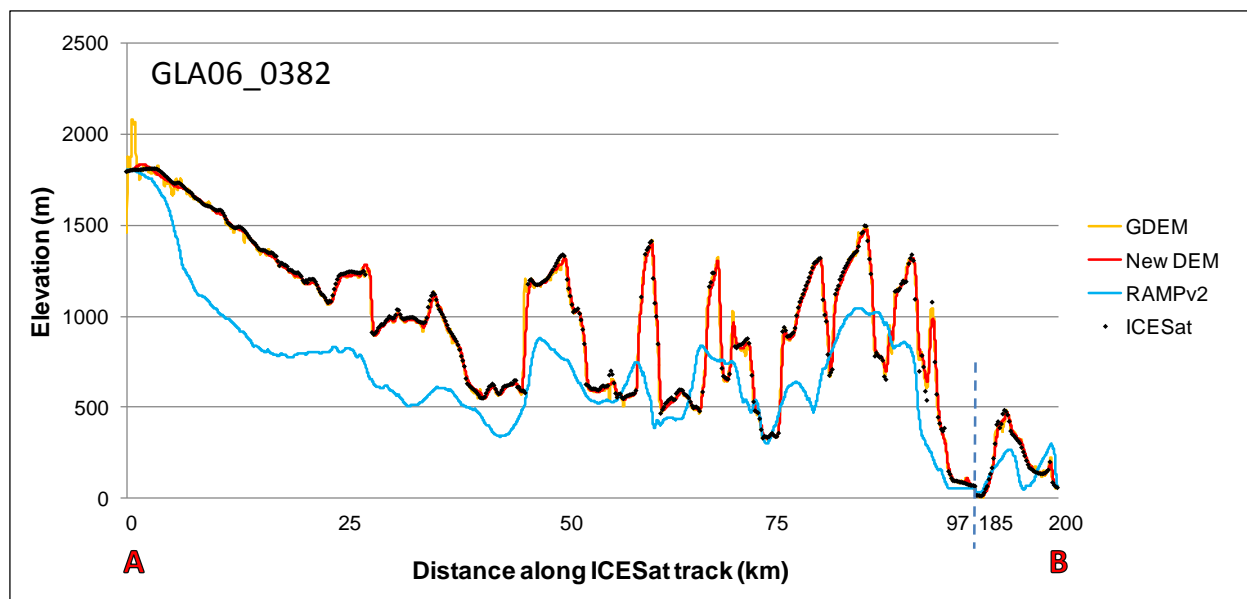

Supplement: Supplementary file 3 [file essd-4-129-2012-supplement.zip]

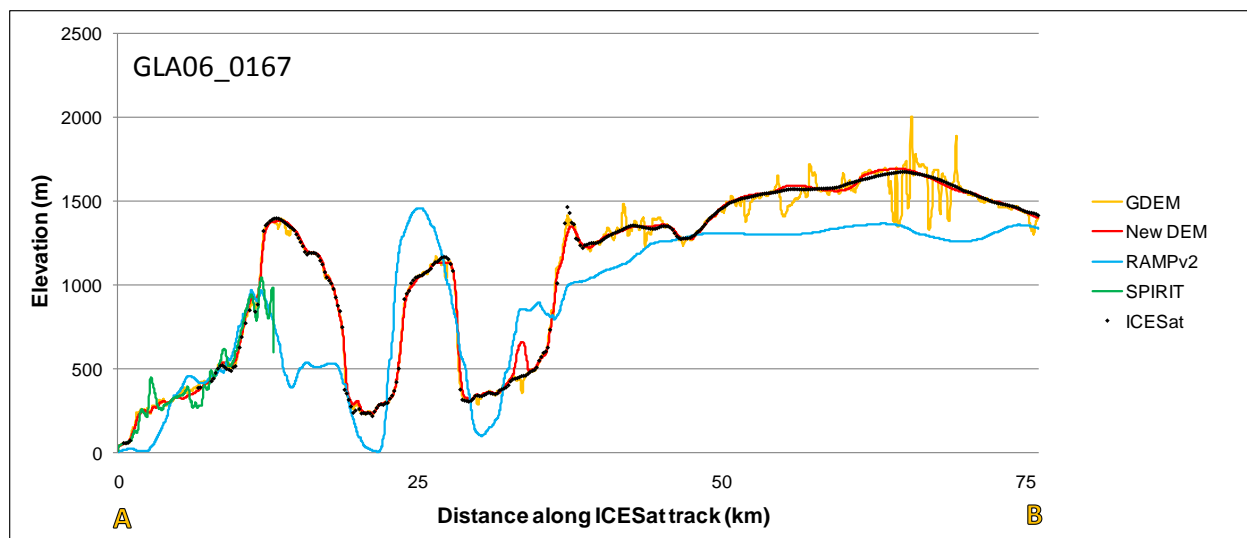

Supplement: Supplementary file 4 [file essd-4-129-2012-supplement.zip]
